# Supplementary material for: Neonatal near misses and associated factors among mother’s who give a live neonate at Hawassa City governmental hospitals, 2019: a facility based cross-sectional study design
Source: Springer Nature journal article supplement (doi:10.1186/s12884-021-03601-2), 2021-02-12
Supplement: MOESM1 [file 18858874]

# Neonatal near misses and associated factors among mother's who give a live neonate at Hawassa City Governmental Hospitals, 2019. A facility based Cross-sectional study design

**Anteneh Fikrie Tekola<sup>1,3\*</sup>, Genet Baye<sup>2</sup>, Elias Amaje<sup>3</sup> and Kebede Tefera<sup>4</sup>**

<sup>1</sup> Public Health Departement, Pharma College Hawassa Campus, Hawassa, South Ethiopia,

<sup>2</sup> Project Officer, Bushulo Child Development and Family Strengthening Project, SOS Child Village Hawassa Program, Hawassa, South Ethiopia,

<sup>3</sup> School of Public Health, College of Medical and Health Sciences, Bule Hora University, Bule Hora, South Ethiopia,

<sup>4</sup> School of Public Health, College of Medicine and Health Sciences, Hawassa University, Hawassa, South Ethiopia,

\* Corresponding authorEmail: [antenehfikrie3@gmail.com](mailto:antenehfikrie3@gmail.com)

## ENGLISH VERSION QUESTIONNAIRE

| Questionnaire number _____                            |                             | Date of interview _____                                                                                  |      |      |
|-------------------------------------------------------|-----------------------------|----------------------------------------------------------------------------------------------------------|------|------|
| Name of interviewer _____                             |                             | Name of Supervisor _____                                                                                 |      |      |
| <b>Section I: socio-economic and demographic data</b> |                             |                                                                                                          |      |      |
| s.no                                                  | Question                    | Option                                                                                                   | Skip | Code |
| 101                                                   | How old are you?            | ----- years                                                                                              |      |      |
| 102                                                   | Marital status              | 1. Single<br>2. Married<br>3. Divorced<br>4. Widowed<br>5. Separated                                     |      |      |
| 103                                                   | Place of residence?         | 1. Urban<br>2. Rural                                                                                     |      |      |
| 104                                                   | Maternal Educational status | 1. Illiterate<br>2. Primary school (grade 1-8)<br>3. Secondary (grade 9-12)<br>4. Twelve and above (12+) |      |      |
| 105                                                   | Paternal Educational status | 1. Illiterate<br>2. Primary school (grade 1-8)<br>3. Secondary (grade 9-12)<br>4. Twelve and above (12+) |      |      |

|                                                     |                                                                                                             |                                                                                                                                                                                         |  |  |
|-----------------------------------------------------|-------------------------------------------------------------------------------------------------------------|-----------------------------------------------------------------------------------------------------------------------------------------------------------------------------------------|--|--|
| 106                                                 | Maternal occupational status                                                                                | 1. Farmer<br>2. house wife<br>3. student<br>4. Government employee<br>5. private organization employee<br>6. NGO employee<br>7. merchant<br>8. Daily laborer<br>9. others, specify_____ |  |  |
| 107                                                 | Average monthly income                                                                                      | ----- birr                                                                                                                                                                              |  |  |
| 108                                                 | Family size                                                                                                 | -----in number                                                                                                                                                                          |  |  |
| <b>Section II: obstetrics history of the mother</b> |                                                                                                             |                                                                                                                                                                                         |  |  |
| 201                                                 | How many times do you get pregnant including the current? (gravidity)                                       | -----times                                                                                                                                                                              |  |  |
| 202                                                 | How many of your pregnancy were >28 weeks?(parity)                                                          | -----times                                                                                                                                                                              |  |  |
| 203                                                 | Have you ever had an abortion? (<28 weeks)if yes how many ?                                                 | 1. Yes-----<br>2. No                                                                                                                                                                    |  |  |
| 204                                                 | How many of your children are alive currently?                                                              | -----                                                                                                                                                                                   |  |  |
| 205                                                 | Did you lose a baby within 28 days afterbirth?                                                              | 1. Yes<br>2. No                                                                                                                                                                         |  |  |
| 206                                                 | Do you have ANC visit ever for the current pregnancy?                                                       | 1. Yes<br>2. No                                                                                                                                                                         |  |  |
| 207                                                 | How many months pregnant were you at first visit of ANC for the current pregnancy?                          | -----months                                                                                                                                                                             |  |  |
| 208                                                 | Was your weight measured during ANC visit?                                                                  | 1. Yes-----Kg<br>2. No                                                                                                                                                                  |  |  |
| 209                                                 | Was your blood pressure measured during ANC visits                                                          | 1. Yes<br>2. No                                                                                                                                                                         |  |  |
| 210                                                 | Have you done all the lab examinations during ANC of the current pregnancy? (observation of medical record) | 1. Blood<br>2. Urine<br>3. Stool<br>4. Others                                                                                                                                           |  |  |
| 211                                                 | How many times did you have ANC visits throughout your current pregnancy?                                   | -----times                                                                                                                                                                              |  |  |
| 212                                                 | How many months pregnant were you when you gave birth of the current pregnancy?                             | -----months                                                                                                                                                                             |  |  |

|                                              |                                                                                                                                       |                                                                              |                    |    |
|----------------------------------------------|---------------------------------------------------------------------------------------------------------------------------------------|------------------------------------------------------------------------------|--------------------|----|
| 213                                          | Have you ever told about any danger sign of complication?                                                                             | 1. Yes<br>2. No                                                              | If no -<br>215     |    |
| 214                                          | Which danger sign of pregnancy were you told?                                                                                         |                                                                              | yes                | N0 |
|                                              |                                                                                                                                       | Vaginal bleeding                                                             | 1                  | 2  |
|                                              |                                                                                                                                       | Severe headache                                                              | 1                  | 2  |
|                                              |                                                                                                                                       | Blurred vision                                                               | 1                  | 2  |
|                                              |                                                                                                                                       | Vaginal gush of Fluid                                                        | 1                  | 2  |
|                                              |                                                                                                                                       | Fever                                                                        | 1                  | 2  |
|                                              |                                                                                                                                       | Abdominal pain                                                               | 1                  | 2  |
|                                              | Other (specify):                                                                                                                      |                                                                              |                    |    |
| 215                                          | Did you take iron and folate during this pregnancy?                                                                                   | 1. Yes<br>2. No                                                              | If no-217          |    |
| 216                                          | If yes, how long?                                                                                                                     | -----                                                                        |                    |    |
| 217                                          | Have you been told that you have anemia for the current pregnancy?                                                                    | 1. Yes<br>2. No                                                              |                    |    |
| 218                                          | If yes have you been treated?                                                                                                         | 1. Yes<br>2. No                                                              |                    |    |
| 219                                          | How long did you stay home after your water broke for the current pregnancy? (rupture of membrane)                                    | 1. 2 days<br>2. 1.5 day<br>3. 1day<br>4. Immediately<br>5. Specify -----     |                    |    |
| 220                                          | When did you decide to come to hospital after as current labour starts? (decision time)                                               | 1. Immediately<br>2. Half day<br>3. One day<br>4. Specify-----               |                    |    |
| 221                                          | Did you get transport access to reach to hospital as you decided to get health care service? (how long did it take to reach hospital) | 1. Immediately<br>2. One-hour after<br>3. Half day<br>4. Other specify ----- |                    |    |
| 222                                          | Have you got health care service immediately as you reach the hospital?                                                               | 1. Yes<br>2. No                                                              | If yes<br>skip 223 |    |
| 223                                          | If no how long did you stay before getting service? Specify                                                                           | -----                                                                        |                    |    |
| <b>Section III: Maternal medical history</b> |                                                                                                                                       |                                                                              |                    |    |
| 301                                          | Did you take any drug for intestinal parasites during the                                                                             | 1. Yes<br>2. No                                                              |                    |    |

|                                                             |                                                                                                  |                                                                           |           |  |
|-------------------------------------------------------------|--------------------------------------------------------------------------------------------------|---------------------------------------------------------------------------|-----------|--|
|                                                             | current pregnancy?                                                                               | 3. Do not remember                                                        |           |  |
| 302                                                         | Have you ever diagnosed severe infection leading to admission or Iv drugs during this pregnancy? | 1. Yes<br>2. No<br>3. Don't remember                                      |           |  |
| 303                                                         | Did you have Hypertension diagnosed by health professionals before this pregnancy?               | 1. Yes<br>2. No                                                           |           |  |
| 304                                                         | Did you have Hypertension developed after getting this pregnancy?                                | 1. Yes<br>2. No                                                           |           |  |
| 305                                                         | Did you have Diabetic Mellitus diagnosed before this pregnancy?                                  | 1. Yes<br>2. No                                                           |           |  |
| 306                                                         | Did you have Diabetic Mellitus developed after getting this pregnancy?                           | 1. Yes<br>2. No                                                           |           |  |
| 307                                                         | Have you been diagnosed for syphilis during the current pregnancy?                               | 1. Yes<br>2. No                                                           |           |  |
| 308                                                         | Is there any other chronic disease diagnosed before? If there is, specify.                       | _____                                                                     |           |  |
| <b>Section IV: Maternal behavioral or lifestyle history</b> |                                                                                                  |                                                                           |           |  |
| 401                                                         | Have you been cooking with smoke during this pregnancy?                                          | 1. Yes 2. No                                                              | If no-404 |  |
| 402                                                         | If yes, how frequent?                                                                            | 1. Always 2. Sometimes                                                    |           |  |
| 404                                                         | Did you consume alcohol drinks during this pregnancy?                                            | 1. Yes 2. No                                                              |           |  |
| 405                                                         | If yes, how frequent did you take alcohol drinks?                                                | 1. Daily<br>2. 3 times per week<br>3. 1 times per week<br>4. Once a month |           |  |
| 406                                                         | Did you smoke cigarrate during this pregnancy?                                                   | 1. Yes<br>2. No                                                           |           |  |
| 407                                                         | If yes, how frequent did you smoke?                                                              | 1. Daily<br>2. 3 times per week<br>3. 1 times per week<br>4. Once a month |           |  |
| 408                                                         | Did you chew chat during this pregnancy?                                                         | 1. Yes<br>2. No                                                           |           |  |
| 409                                                         | If yes, how frequent did you chew chat?                                                          | 1. Daily 2). 3 times per week<br>3). 1 times per week 4). 1 per month     |           |  |

| <b>Section V:Condition of the Neonate</b>     |                                                                                                                                                                                                                             |                                                                     |     |             |
|-----------------------------------------------|-----------------------------------------------------------------------------------------------------------------------------------------------------------------------------------------------------------------------------|---------------------------------------------------------------------|-----|-------------|
| 501                                           | Mode of delivery of the current pregnancy                                                                                                                                                                                   | 1.Vaginal delivery<br>2.Assisted delivery<br>3.Cesarean section     |     | observation |
| 502                                           | Gestational age of neonate at birth                                                                                                                                                                                         | -----weeks                                                          |     |             |
| 503                                           | Neonates gender                                                                                                                                                                                                             | 1. Male 2. Female                                                   |     |             |
| 504                                           | Neonates weight( in grams)                                                                                                                                                                                                  | -----grams                                                          |     |             |
| 505                                           | Identified problem either pragmatic or management criteria (circle it)<br><br>These criteria's will be selected by the interviewer using health records and observation of the neonate<br>More than one choice is possible. | <b>Pragmatic criteria( checklist)</b>                               | Yes | No          |
|                                               |                                                                                                                                                                                                                             | 1. Birth weight less than 1750 g                                    |     |             |
|                                               |                                                                                                                                                                                                                             | 2. Apgar score less than 7 at 5 <sup>th</sup> minute                |     |             |
|                                               |                                                                                                                                                                                                                             | 3. Gestational age less than 33weeks                                |     |             |
|                                               |                                                                                                                                                                                                                             | <b>Management criteria's</b>                                        | Yes | No          |
|                                               |                                                                                                                                                                                                                             | 4. Respiratory distress/apnea                                       |     |             |
|                                               |                                                                                                                                                                                                                             | 5. Blood transfusion                                                |     |             |
|                                               |                                                                                                                                                                                                                             | 6. Presence of infection                                            |     |             |
|                                               |                                                                                                                                                                                                                             | 7. Persisting signs of respiratory distress for more than one hour. |     |             |
|                                               |                                                                                                                                                                                                                             | 8. Requirement for intermittent positive pressure ventilation.      |     |             |
|                                               |                                                                                                                                                                                                                             | 9. Bile stained vomiting (signs suggesting bowel obstruction)       |     |             |
|                                               |                                                                                                                                                                                                                             | 10. Feeding problems severe enough to cause clinical concern        |     |             |
|                                               |                                                                                                                                                                                                                             | 11. Cardiovascular Problems requiring monitoring or intervention    |     |             |
|                                               |                                                                                                                                                                                                                             | 12. Congenital Malformations that may require intervention          |     |             |
|                                               |                                                                                                                                                                                                                             | 13. Convulsion                                                      |     |             |
|                                               |                                                                                                                                                                                                                             | 14. Surgery                                                         |     |             |
|                                               |                                                                                                                                                                                                                             | 15. Phototherapy in 24 hours of life.                               |     |             |
| 16. parenteral intravenous drugs or nutrition |                                                                                                                                                                                                                             |                                                                     |     |             |
| 17. Any intubation                            |                                                                                                                                                                                                                             |                                                                     |     |             |
| 506                                           | One of the above criteria's present, classify as neonatal near miss case                                                                                                                                                    |                                                                     |     |             |
| 507                                           | If there is no problem identified among list of question number 505,then                                                                                                                                                    |                                                                     |     |             |

|  |                            |  |  |  |
|--|----------------------------|--|--|--|
|  | classify as normal neonate |  |  |  |
|--|----------------------------|--|--|--|
