# Supplementary material for: Neonatal near misses and associated factors among mother’s who give a live neonate at Hawassa City governmental hospitals, 2019: a facility based cross-sectional study design
Source: Springer Nature journal article supplement (doi:10.1186/s12884-021-03601-2), 2021-02-12
Supplement: MOESM2 [file 18858874]

STROBE Statement—Checklist of items that should be included in reports of *cross-sectional studies*

|                          | Item No | Recommendation                                                                                                                           | Remarks                                                                 |
|--------------------------|---------|------------------------------------------------------------------------------------------------------------------------------------------|-------------------------------------------------------------------------|
| Title and abstract       | 1       | (a) Indicate the study's design with a commonly used term in the title or the abstract                                                   | "Title page, line 3"                                                    |
|                          |         | (b) Provide in the abstract an informative and balanced summary of what was done and what was found                                      | "Abstract, page number 2"                                               |
| <b>Introduction</b>      |         |                                                                                                                                          |                                                                         |
| Background/rationale     | 2       | Explain the scientific background and rationale for the investigation being reported                                                     | "Background, paragraph 5"                                               |
| Objectives               | 3       | State specific objectives, including any prespecified hypotheses                                                                         | "Background, paragraph 5 line 8-10"                                     |
| <b>Methods</b>           |         |                                                                                                                                          |                                                                         |
| Study design             | 4       | Present key elements of study design early in the paper                                                                                  | "Methods, paragraph 1"                                                  |
| Setting                  | 5       | Describe the setting, locations, and relevant dates, including periods of recruitment, exposure, follow-up, and data collection          | "Methods, paragraph 1"                                                  |
| Participants             | 6       | (a) Give the eligibility criteria, and the sources and methods of selection of participants                                              | "Methods, Study participants, inclusion and exclusion criteria section" |
| Variables                | 7       | Clearly define all outcomes, exposures, predictors, potential confounders, and effect modifiers. Give diagnostic criteria, if applicable | "Methods, data collection and quality assurance section paragraph 2"    |
| Data sources/measurement | 8*      | For each variable of interest, give sources of data and details of methods of assessment (measurement). Describe                         | "Methods, data collection and quality assurance section paragraph 1"    |

|                        |     |                                                                                                                                                                                                   |                                                                      |
|------------------------|-----|---------------------------------------------------------------------------------------------------------------------------------------------------------------------------------------------------|----------------------------------------------------------------------|
|                        |     | comparability of assessment methods if there is more than one group                                                                                                                               |                                                                      |
| Bias                   | 9   | Describe any efforts to address potential sources of bias                                                                                                                                         | “Methods, data collection and quality assurance section paragraph 1” |
| Study size             | 10  | Explain how the study size was arrived at                                                                                                                                                         | “Methods, Sample size determination and sampling procedure section”  |
| Quantitative variables | 11  | Explain how quantitative variables were handled in the analyses. If applicable, describe which groupings were chosen and why                                                                      | “Methods,Data processing and analysis section line 3”                |
| Statistical methods    | 12  | (a) Describe all statistical methods, including those used to control for confounding                                                                                                             | “Methods,Data processing and analysis section line 7”                |
|                        |     | (b) Describe any methods used to examine subgroups and interactions                                                                                                                               | “Methods,Data processing and analysis section line 9”                |
|                        |     | (c) Explain how missing data were addressed                                                                                                                                                       | “N/A”.                                                               |
|                        |     | (d) If applicable, describe analytical methods taking account of sampling strategy                                                                                                                | “Methods,Data processing and analysis section line 4”                |
|                        |     | (e) Describe any sensitivity analyses                                                                                                                                                             | “N/A”.                                                               |
| <b>Results</b>         |     |                                                                                                                                                                                                   |                                                                      |
| Participants           | 13* | (a) Report numbers of individuals at each stage of study—eg numbers potentially eligible, examined for eligibility, confirmed eligible, included in the study, completing follow-up, and analysed | “Results, paragraph 1 line 1”                                        |
|                        |     | (b) Give reasons for non-                                                                                                                                                                         | “Results, paragraph 1 line 4”                                        |

|                   |     |                                                                                                                                                                                                              |                                                           |
|-------------------|-----|--------------------------------------------------------------------------------------------------------------------------------------------------------------------------------------------------------------|-----------------------------------------------------------|
|                   |     | participation at each stage                                                                                                                                                                                  |                                                           |
|                   |     | (c) Consider use of a flow diagram                                                                                                                                                                           | “N/A”.                                                    |
| Descriptive data  | 14* | (a) Give characteristics of study participants (eg demographic, clinical, social) and information on exposures and potential confounders                                                                     | “Results, table 2 and 3”                                  |
|                   |     | (b) Indicate number of participants with missing data for each variable of interest                                                                                                                          | “N/A”.                                                    |
| Outcome data      | 15* | Report numbers of outcome events or summary measures                                                                                                                                                         | “Neonatal Near miss, page 8”                              |
| Main results      | 16  | (a) Give unadjusted estimates and, if applicable, confounder-adjusted estimates and their precision (eg, 95% confidence interval). Make clear which confounders were adjusted for and why they were included | “Factors associated with NNM, page 8 and Table 5 page 21” |
|                   |     | (b) Report category boundaries when continuous variables were categorized                                                                                                                                    | “Factors associated with NNM, page 8 and Table 5 page 21” |
|                   |     | (c) If relevant, consider translating estimates of relative risk into absolute risk for a meaningful time period                                                                                             | “N/A”.                                                    |
| Other analyses    | 17  | Report other analyses done—eg analyses of subgroups and interactions, and sensitivity analyses                                                                                                               | “N/A”.                                                    |
| <b>Discussion</b> |     |                                                                                                                                                                                                              |                                                           |
| Key results       | 18  | Summarise key results with reference to study objectives                                                                                                                                                     | “Discussion, paragraph 1”                                 |
| Limitations       | 19  | Discuss limitations of the study, taking into account sources of potential bias or imprecision.                                                                                                              | “Discussion, paragraph 6”                                 |

|                          |    |                                                                                                                                                                            |                                 |
|--------------------------|----|----------------------------------------------------------------------------------------------------------------------------------------------------------------------------|---------------------------------|
|                          |    | Discuss both direction and magnitude of any potential bias                                                                                                                 |                                 |
| Interpretation           | 20 | Give a cautious overall interpretation of results considering objectives, limitations, multiplicity of analyses, results from similar studies, and other relevant evidence | “Discussion, paragraph 2-5”     |
| Generalizability         | 21 | Discuss the generalizability (external validity) of the study results                                                                                                      | “Discussion, paragraph 6”       |
| <b>Other information</b> |    |                                                                                                                                                                            |                                 |
| Funding                  | 22 | Give the source of funding and the role of the funders for the present study and, if applicable, for the original study on which the present article is based              | “Declarations, funding section” |
